# Supplementary material
Source: PubMed Central journal article supplement (PMC3449381)
Supplement: 97320630008722S1.pdf [file 97320630008722S1.pdf]

## Supplementary material:

**Table 1:** Physicochemical properties of hypothetical proteins by Protparam tool

| Sequence ID  | No of aa | MW      | pI    | (-) R | (+ R) | EC    | II    | AI     | GRAVY  |
|--------------|----------|---------|-------|-------|-------|-------|-------|--------|--------|
| gi 166409299 | 97       | 10407.8 | 10.11 | 1     | 12    | 25440 | 43.32 | 65.36  | -0.182 |
| gi 166409303 | 129      | 15748.3 | 10.14 | 13    | 31    | 22920 | 41.52 | 83.8   | -0.877 |
| gi 166409302 | 208      | 23392.4 | 9.29  | 27    | 34    | 7450  | 22.22 | 115.72 | -0.148 |
| gi 166409301 | 103      | 12163.4 | 9.73  | 11    | 20    | 11920 | 22.96 | 113.4  | -0.287 |
| gi 166409300 | 644      | 75501.5 | 9.14  | 60    | 73    | 77825 | 35.81 | 119.1  | 0.128  |
| gi 390516769 | 31       | 3677.5  | 9.3   | 3     | 5     | 1490  | 7.98  | 138.39 | 0.726  |
| gi 166409293 | 139      | 15938.3 | 9.37  | 12    | 18    | 13075 | 36.4  | 95.4   | -0.443 |
| gi 390516759 | 209      | 24226.7 | 9.25  | 23    | 32    | 19495 | 23.33 | 91.87  | -0.612 |
| gi 390516760 | 80       | 9250.4  | 4.76  | 15    | 11    | 4470  | 64.89 | 101.12 | -0.611 |
| gi 166409294 | 323      | 35653   | 6.25  | 36    | 34    | 40340 | 30.12 | 105.82 | 0.004  |

**Table 2:** Identification of domains by CDD-BLAST

| Sequence ID  | Domains                                   |
|--------------|-------------------------------------------|
| gi 166409299 | Lactococcin_972 super family              |
| gi 166409303 | Mob_Pre super family                      |
| gi 166409302 | ABC_MJ0796_Lo1CDE_FtsE,<br>L_ocin_972_ABC |
| gi 166409301 | DUF1093 super family                      |
| gi 166409300 | DUF1430 super family,<br>COG4652          |
| gi 166409293 | HTH_MARR,<br>HTH super family             |
| gi 166409294 | MDR_yhdh_yhfp, oxido_YhdH                 |

**Table 3:** Functional description of superfamilies of hypothetical proteins

| Superfamily                | Description                                                                                                                                                                                                                                                                                                                                                                                                                                                                                                                                                                                                                                                                                                                                                    |
|----------------------------|----------------------------------------------------------------------------------------------------------------------------------------------------------------------------------------------------------------------------------------------------------------------------------------------------------------------------------------------------------------------------------------------------------------------------------------------------------------------------------------------------------------------------------------------------------------------------------------------------------------------------------------------------------------------------------------------------------------------------------------------------------------|
| Lactococcin_972<br>Mob_Pre | Represent bacteriocins related to lactococcin. Associates with a seven transmembrane putative immunity protein.                                                                                                                                                                                                                                                                                                                                                                                                                                                                                                                                                                                                                                                |
| L_ocin_972_ABC             | With some plasmids, recombination can occur in a site specific manner that is independent of RecA. In such cases, the recombination event requires another protein called Pre. Pre is a plasmid recombination enzyme. This protein is also known as Mob (conjugative mobilisation). putative bacteriocin export ABC transporter, lactococcin 972 group; A gene pair with a fairly wide distribution consists of a polypeptide related to the lactococcin 972 and multiple-membrane-spanning putative immunity protein. This model represents a small clade within the ABC transporters that regularly are found adjacent to these bacteriocin system gene pairs and are likely serve as export proteins.                                                       |
| ABC_MJ0796_Lo1CDE<br>_FtsE | This family is comprised of MJ0796 ATP-binding cassette, macrolide-specific ABC-type efflux carrier (MacAB), and proteins involved in cell division (FtsE), and release of lipoproteins from the cytoplasmic membrane (Lo1CDE). They are clustered together phylogenetically. MacAB is an exporter that confers resistance to macrolides, while the Lo1CDE system is not a transporter at all. An FtsE null mutants showed filamentous growth and appeared viable on high salt medium only, indicating a role for FtsE in cell division and/or salt transport. The Lo1CDE complex catalyses the release of lipoproteins from the cytoplasmic membrane prior to their targeting to the outer membrane.                                                          |
| DUF1093<br>DUF1430         | Proteins of unknown function<br>This family represents the C-terminus (approximately 120 residues) of a number of hypothetical bacterial proteins of unknown function. These are possibly membrane proteins involved in immunity.                                                                                                                                                                                                                                                                                                                                                                                                                                                                                                                              |
| COG4652<br>HTH             | Uncharacterized protein conserved in bacteria [Function unknown]<br>Helix-turn-helix domains; A large family of mostly alpha-helical protein domains with a characteristic fold: most members function as sequence-specific DNA binding domains, such as in transcription regulators. This superfamily also includes the winged helix-turn-helix domains.                                                                                                                                                                                                                                                                                                                                                                                                      |
| HTH_MARR<br>oxido_YhdH     | helix_turn_helix multiple antibiotic resistance protein<br>putative quinone oxidoreductase, YhdH/YhP family; a superfamily in which some members are zinc-binding medium-chain alcohol dehydrogenases while others are quinone oxidoreductases with no bound zinc. This subfamily includes proteins studied crystallographically for insight into function: YhdH from Escherichia coli and YhP from Bacillus subtilis. Members bind NADPH or NAD, but not zinc.                                                                                                                                                                                                                                                                                                |
| MDR_yhdh_yhfp              | Yhdh and yhfp-like putative quinone oxidoreductases; QOR catalyzes the conversion of a quinone + NAD(P)H to a hydroquinone + NAD(P)+. Quinones are cyclic diones derived from aromatic compounds. Membrane bound QOR act in the respiratory chains of bacteria and mitochondria, while soluble QOR acts to protect from toxic quinones (e.g. DT-diaphorase). QOR reduces quinones through a semi-quinone intermediate via a NAD(P)H-dependent single electron transfer. QOR is a member of the medium chain dehydrogenase/reductase family, but lacks the zinc-binding sites of the prototypical alcohol dehydrogenases of this group. NAD(P)(H)-dependent oxidoreductases are the major enzymes in the interconversion of alcohols and aldehydes, or ketones. |

**Table 4:** Prediction of Subcellular localization sites in hypothetical proteins by PSORTB

| Sequence ID  | Localization        |
|--------------|---------------------|
| gi 390516760 | Cytoplasmic         |
| gi 390516759 | Unknown             |
| gi 166409293 | Cytoplasmic         |
| gi 166409299 | CytoplasmicMembrane |
| gi 166409303 | Unknown             |
| gi 166409302 | CytoplasmicMembrane |
| gi 390516769 | CytoplasmicMembrane |
| gi 166409301 | Unknown             |
| gi 166409300 | CytoplasmicMembrane |
| gi 166409294 | CytoplasmicMembrane |

**Table 5:** Families found by PFAM database

| Sequence ID  | Pfam-A                        | Pfam-B       | Domain   |
|--------------|-------------------------------|--------------|----------|
| gi 166409294 | ADH_zinc_N                    | -            | ADH_N    |
| gi 390516760 | DUF885                        | -            | YoID     |
| gi 390516759 | -                             | Pfam-B_7040  | -        |
| gi 166409293 | MarR                          | Pfam-B_33    | -        |
| gi 390516769 | DUF1430                       | Pfam-B_2627  | -        |
| gi 166409300 | DUF1430                       | -            | -        |
| gi 166409301 | Tmemb_9<br>DUF1312<br>DUF1093 | Pfam-B_15664 | -        |
| gi 166409302 | -                             | Pfam-B_16450 | ABC_tran |
| gi 166409303 | Mob_Pre                       | -            | -        |
| gi 166409299 | Lactococcin_972               | -            | -        |

**Table 6:** Descriptions of Pfam families of hypothetical proteins

| Sequence ID  | Description                                                                  |
|--------------|------------------------------------------------------------------------------|
| gi 166409294 | Alcohol dehydrogenase GroES-like domain<br>Zinc-binding dehydrogenase family |
| gi 390516760 | YoID-like protein                                                            |
| gi 166409293 | MAR family; multiple antibiotic resistance                                   |
| gi 166409301 | TMEM9; widely expressed and localised to the late endosomes and lysosomes    |
| gi 166409302 | ABC transporters belong to the ATP-Binding Cassette superfamily              |

**Table 7:** SOSUI result of hypothetical proteins

| Sequence ID  | N-terminal | Transmembrane region    | C-terminal | Type      | Length |
|--------------|------------|-------------------------|------------|-----------|--------|
| gi 166409299 | 42         | FVSSCIASTILFGTLLGVTYKAE | 64         | PRIMARY   | 23     |
| gi 166409301 | 41         | TLIIVTIVLLIIILSLLLVRN   | 61         | PRIMARY   | 21     |
| gi 166409300 | 184        | ILFFELVIDNDLLVPFIFLGVLY | 206        | SECONDARY | 23     |
|              | 242        | KIIYWLVLTITFFIANILIIHIA | 264        | PRIMARY   | 23     |
|              | 279        | VLLFVFACITTLWLISYSLLLK  | 301        | PRIMARY   | 23     |
|              | 317        | SIFMGFTFKCIMVLISFLLAQN  | 339        | SECONDARY | 23     |
|              | 575        | IITIVTIIINVFILLIATVFEII | 597        | PRIMARY   | 23     |
|              | 633        | IMLAYTTHILFGSKVLLFIIMSI | 655        | PRIMARY   | 23     |

**Table 8:** Hypothetical proteins interacting with functionally important proteins

| Sequence ID  | Interacting proteins                                                        |
|--------------|-----------------------------------------------------------------------------|
| gi 166409299 | arsenate reductase                                                          |
| gi 166409302 | elongation factor G<br>30S ribosomal protein S7<br>30S ribosomal protein S5 |
| gi 166409301 | ABC transporter ATP-binding protein                                         |
| gi 166409300 | cysteine protease precursor                                                 |
| gi 390516769 | type I restriction-modification system endonuclease                         |
| gi 166409293 | carboxy-terminal processing proteinase CtpA                                 |
| gi 166409294 | regulatory protein MarR                                                     |

**Table 9:** Templates used by PS2 server for modeling

| Sequence ID  | Templates |
|--------------|-----------|
| gi 166409300 | 1rh1A     |
| gi 166409294 | 1tt7A     |
| gi 166409293 | 1z91A     |
| gi 166409302 | 2it1A     |

**Table 10:** Residues involved in ligand binding sites predicted by QSITE finder

| Sequence ID  | Site volume | Residues                                                                                                                                                                                   |
|--------------|-------------|--------------------------------------------------------------------------------------------------------------------------------------------------------------------------------------------|
| gi 166409293 | 209         | SER 14, ARG 17, VAL 18, PHE 19, HIS 21, PHE 22, LEU 111, ASN 112, PHE 116, ALA 117, ASN 118, LEU 119.                                                                                      |
| gi 166409294 | 419         | ILE 40, ASN 41 & 243, TYR 42, ALA 128, GLY 156, 159,160 & 162, 242, 313 & 317, VAL 161 & 244, THR 219, CYS 241, GLN 309 & 314, LEU 310 & 311, LYS 312, HIS 315, ARG 318, PHE 152, SER 153. |
| gi 166409300 | 169         | GLY 56, LEU 57 & 58, LYS 60, ASN 61, ILE 64, TYR 90, ASN 148, VAL 149, PHE 152.                                                                                                            |
| gi 166409302 | 241         | GLU 157, THR 159, GLY 160, LEU 162, ASP 163, THR 164, GLY 167, LYS 168, ILE 171, THR 188, HIS 189, ASP 190, GLU 192, LEU 193.                                                              |
